# Supplementary material
Source: Springer Nature journal article supplement (https://www.springermedizin.de/resource/supplementary/12875_2010_489_MOESM2_ESM.pdf/9434720)
Supplement: MOESM2 [file 9434720]

Patients with physical  
complaints in general practice  
n = 917

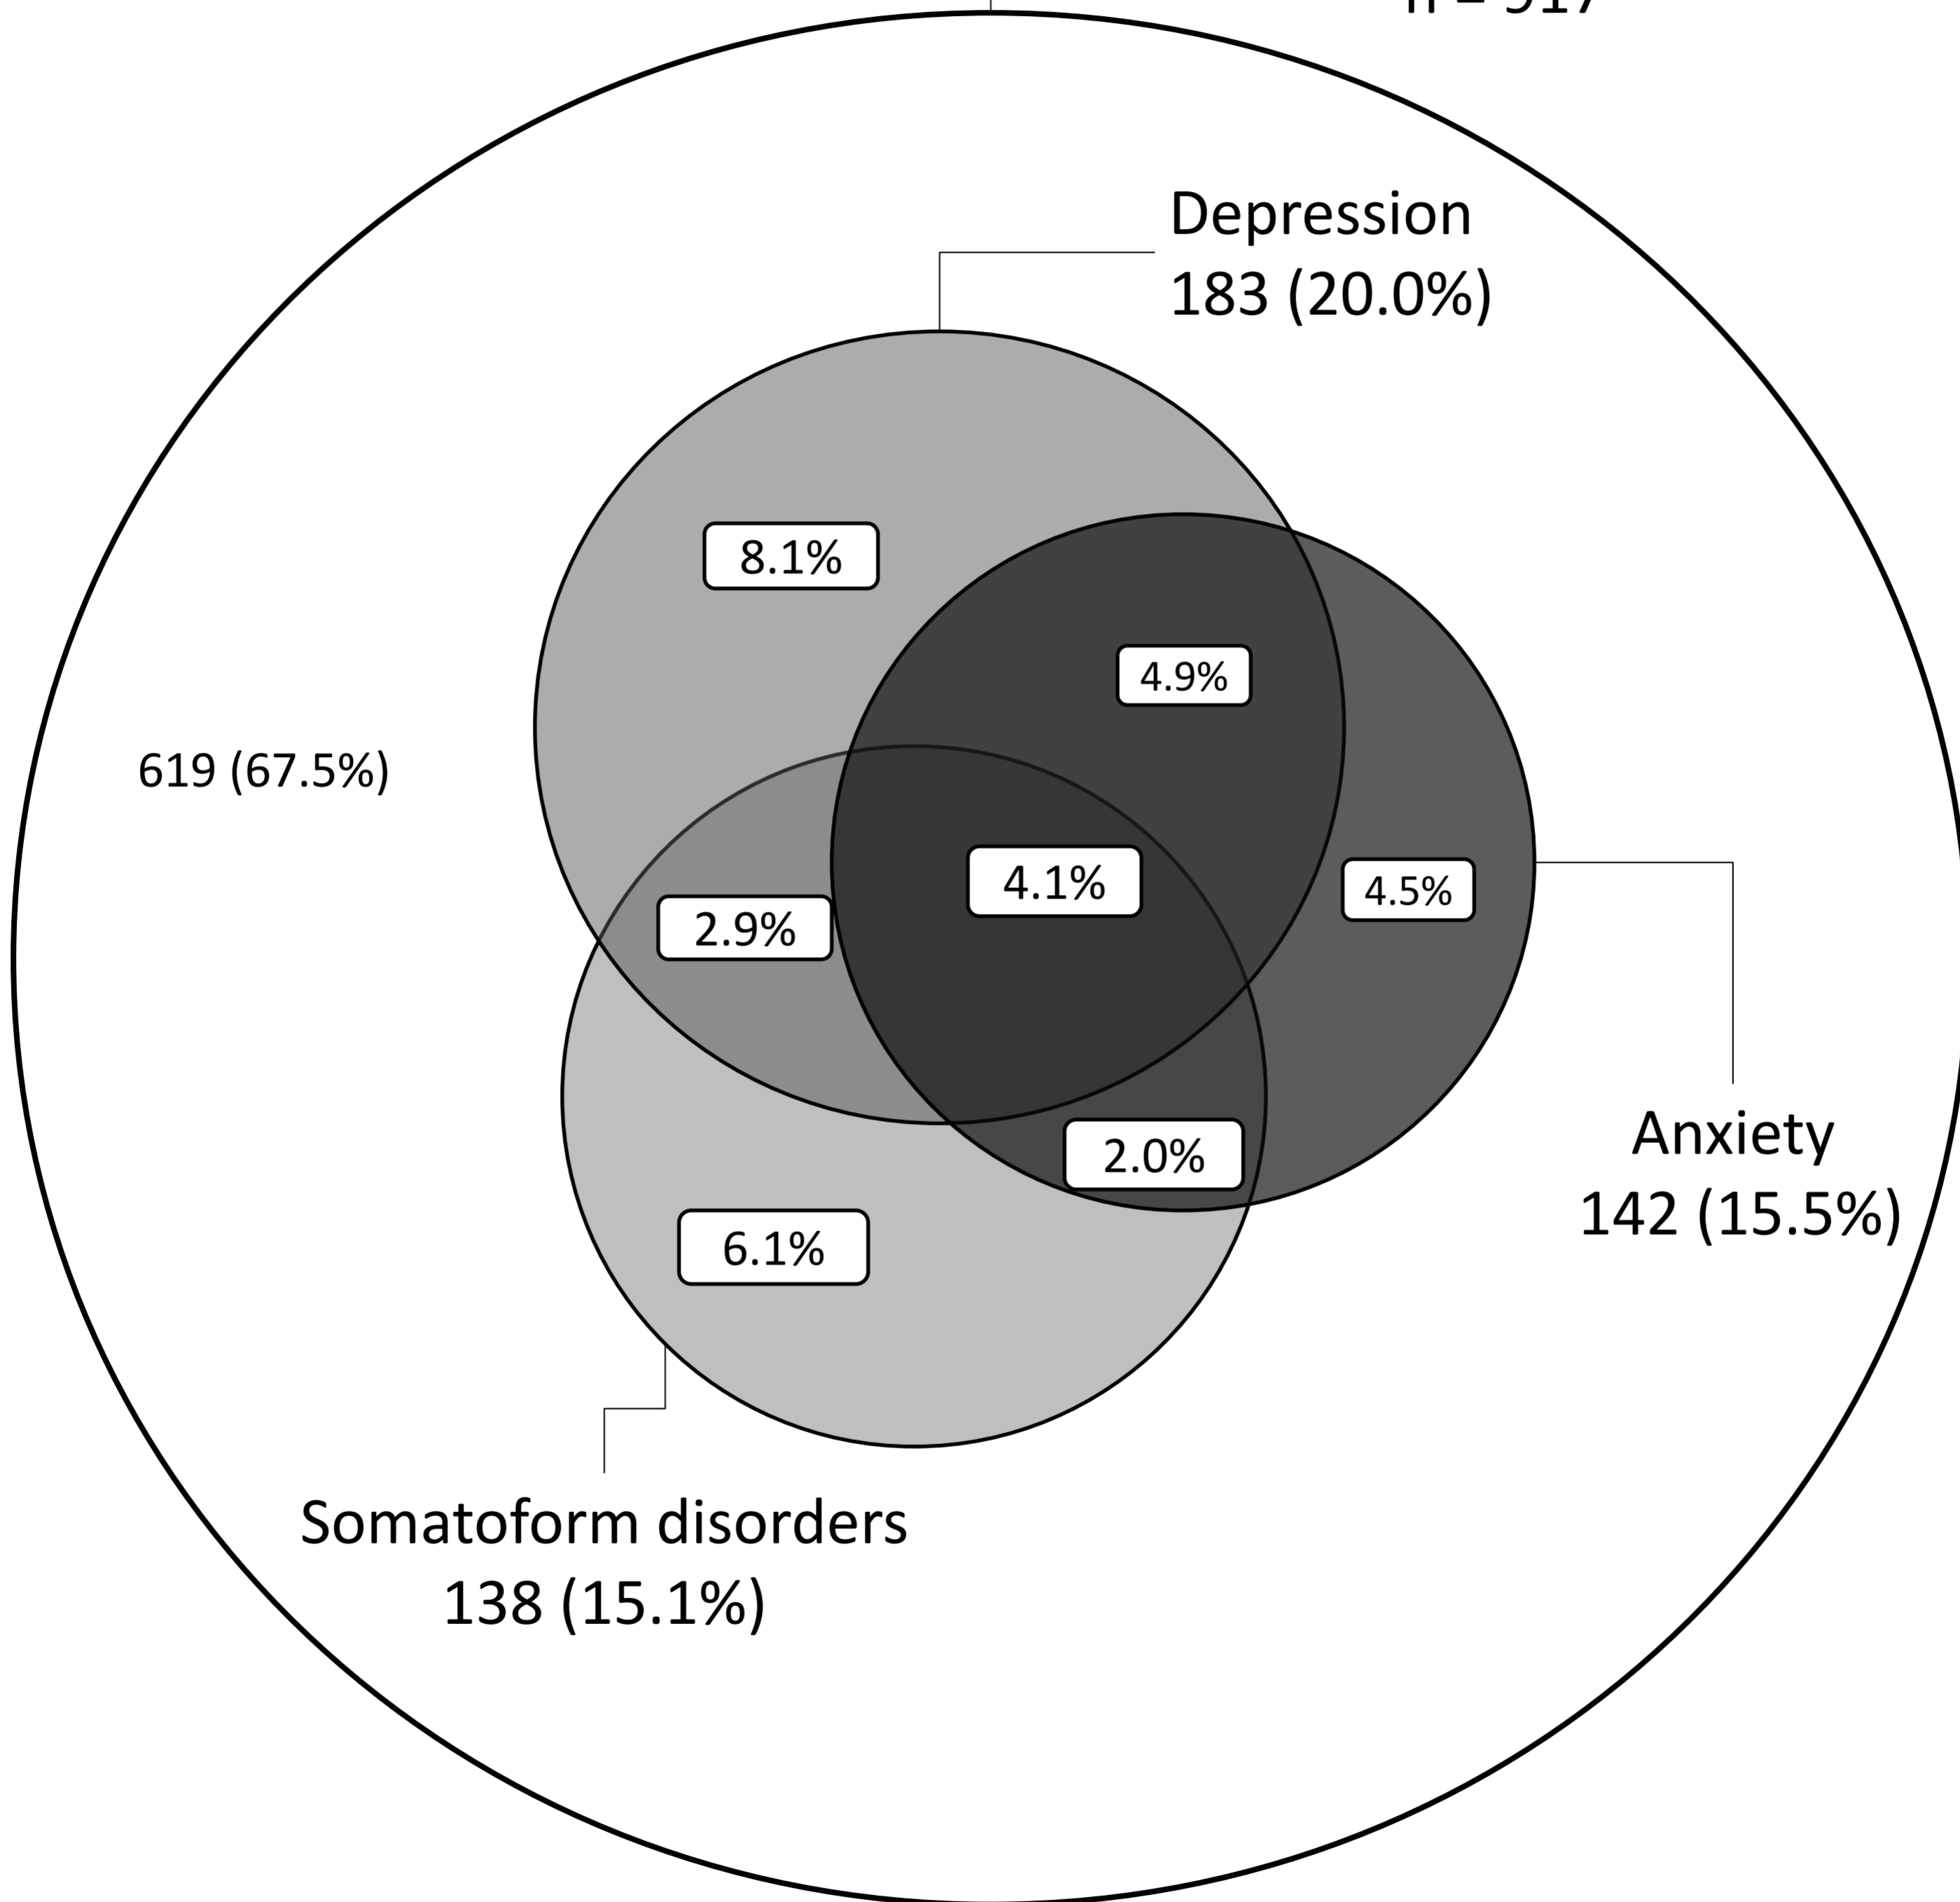

Depression  
183 (20.0%)

619 (67.5%)

8.1%

4.9%

2.9%

4.1%

4.5%

Anxiety  
142 (15.5%)

2.0%

6.1%

Somatoform disorders  
138 (15.1%)
